# Supplementary material for: Dietary Patterns in Early Childhood and the Risk of Childhood Overweight: The GECKO Drenthe Birth Cohort
Source: MDPI journal article supplement (doi:10.3390/nu13062046), 2021-06-15
Supplement: s1 [file s1]

Supplementary Figure S1. Selection of the study population.

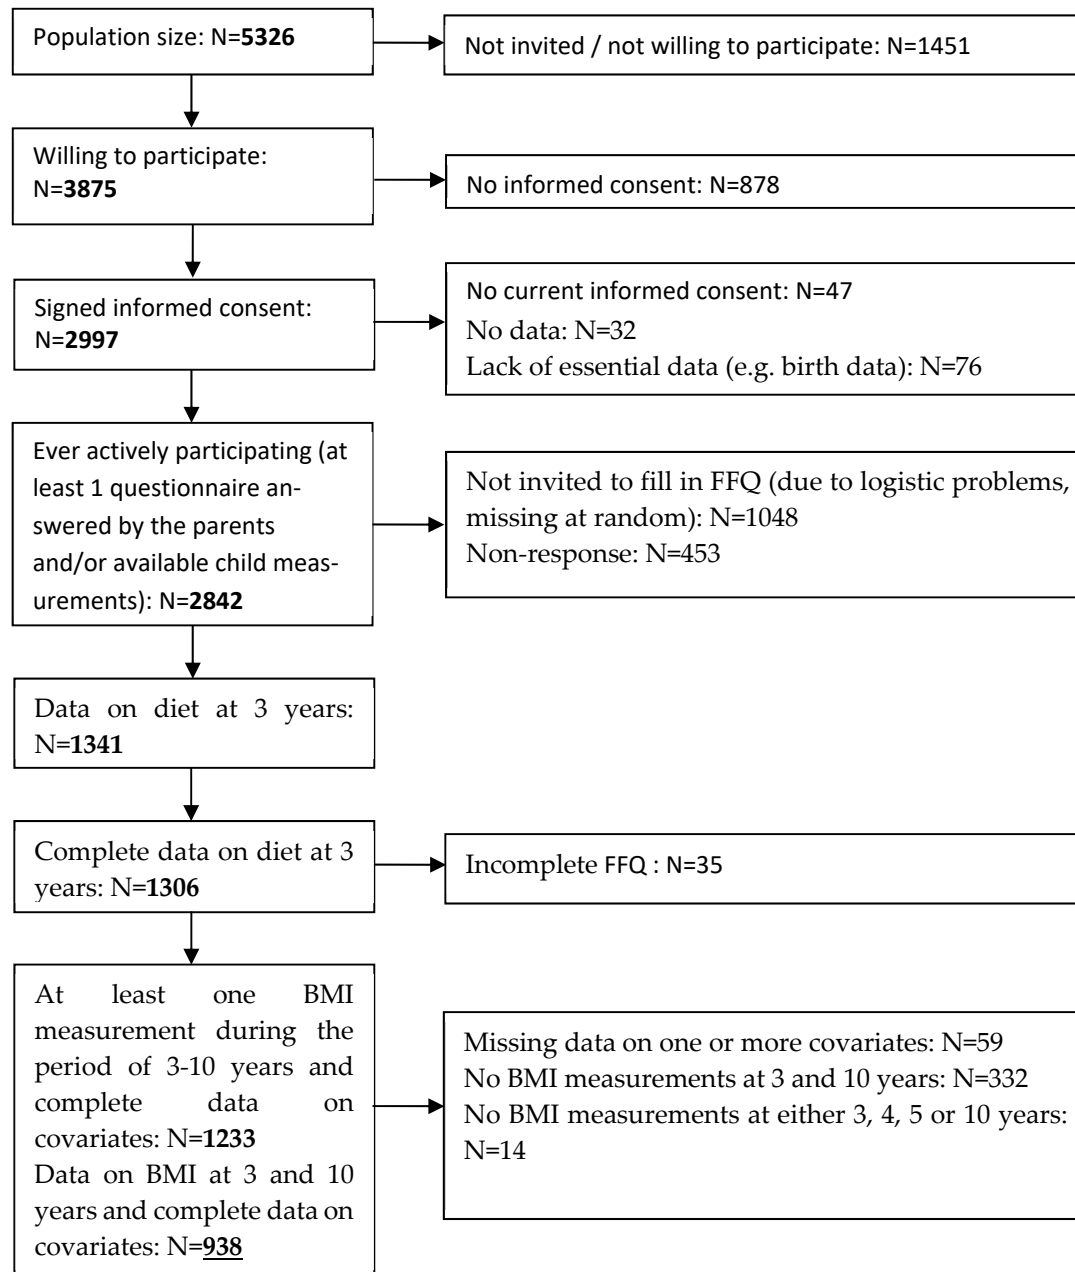



Supplementary Table S1. Food grouping for PCA

| <b>Food group</b>        | <b>Food items</b>                                                                     |
|--------------------------|---------------------------------------------------------------------------------------|
| Water                    | Water and tea (without sugar)                                                         |
| Vegetables               | Raw and cooked vegetables and beans                                                   |
| Fruit                    | Fruit and fruit compote                                                               |
| Whole-grain bread        | Whole-grain bread, rye bread, whole-grain crackers                                    |
| Fish                     | Fish, shellfish and fish sticks                                                       |
| Sauces                   | Ketchup, mayonnaise, brown sauce, apple sauce and other sauces                        |
| Potatoes                 | Plain potatoes (excluding fried or baked potatoes)                                    |
| Eggs                     | Fried or baked potatoes and French fries                                              |
| Fried and baked potatoes | Water and tea (without sugar)                                                         |
| Savory dishes            | Composite dishes                                                                      |
| Chicken                  | All processed and non-processed chicken/poultry (except chicken nuggets)              |
| Meat                     | All processed and non-processed meat (except those included in 'savory snacks' group) |
| Milk and buttermilk      | Plain milk (full-fat, semi-skimmed or skimmed) and plain sour milk                    |
| Dairy desserts           | Yogurt (full-fat, semi-skimmed or skimmed yoghurt), custard, pudding and cream        |
| Crisps                   | Crisps and prawn crackers                                                             |
| Cheese                   | Cheese and cream cheese                                                               |
| Cakes and confectionery  | Cakes, pancakes, wafels, pastry, ice cream, candy and chocolate                       |
| Butter and oil           | Butter, oil and margarine                                                             |
| White bread              | White bread, toast, currant bread, baguette, croissant                                |
| Breakfast cereals        | Cornflakes, breakfast cereals and muesli                                              |



|                             |                                                                                 |
|-----------------------------|---------------------------------------------------------------------------------|
| Added sugar                 | Sugar, honey or syrup added to foods and drinks                                 |
| Sweet bread toppings        | Jam, chocolate spreads, peanut butter, sprinkles                                |
| Sugar-sweetened beverages   | Soft drinks, fruit drinks and lemonade with sugar                               |
| Cookies                     | Cookies, biscuits and muesli bars                                               |
| Rice and pasta              | Rice and pasta                                                                  |
| Vegetarian meat substitutes | Meat substitutes made of soy, quorn or tahoe                                    |
| Porridge                    | Oatmeal and wheat porridge                                                      |
| Soya milk products          | Soy milk, soy dessert, flavoured soy milk                                       |
| Nuts and raisins            | Peanuts, nuts and raisins                                                       |
| Crackers                    | Waffels, rusks, crackers and soup sticks                                        |
| Savory snacks               | Pizza, hamburgers, sausage rolls, chicken nuggets, meat croquettes and hot dogs |
| Dairy drinks with sugar     | Yoghurt drinks with sugar and chocolate-flavored milk                           |
| Light drinks                | Sugar-free, artificially sweetened flavored drinks                              |



Supplementary Table S2. Associations between dietary patterns and overweight at 3 years, sensitivity analysis using the WHO definition of overweight (N=938).

|                                        | Overweight at 3 years* |            |         | Model 2, adjusted |            |         |
|----------------------------------------|------------------------|------------|---------|-------------------|------------|---------|
|                                        | Model 1, crude         |            |         |                   |            |         |
|                                        | OR                     | 95% CI     | p-value | OR                | 95% CI     | p-value |
| Dietary pattern                        |                        |            |         |                   |            |         |
| Pattern 1: 'minimally processed foods' | 0.77                   | 0.53, 1.12 | 0.17    | 0.78              | 0.52, 1.15 | 0.20    |
| Pattern 2: 'ultra-processed foods'     | 1.47                   | 1.03, 2.10 | 0.04    | 1.36              | 0.92, 2.02 | 0.12    |

\* defined as BMI-sds according to. Both pattern scores were used as determinants simultaneously, in order to adjust for the adherence for the other pattern. Model 2 is adjusted for maternal age, pre-pregnancy BMI, parity, ethnicity, maternal smoking during pregnancy, educational level, birth weight and gestational age.



Supplementary Table S3. Associations between dietary patterns and overweight at 10 years, sensitivity analysis using the WHO definition of overweight (N=938).

|                                        | Overweight at 10 years* |            |         | Model 2, adjusted |            |         |
|----------------------------------------|-------------------------|------------|---------|-------------------|------------|---------|
|                                        | Model 1, crude          |            |         |                   |            |         |
|                                        | OR                      | 95% CI     | p-value | OR                | 95% CI     | p-value |
| Dietary pattern                        |                         |            |         |                   |            |         |
| Pattern 1: 'minimally processed foods' | 1.02                    | 0.88, 1.19 | 0.77    | 1.06              | 0.90, 1.25 | 0.49    |
| Pattern 2: 'ultra-processed foods'     | 1.28                    | 1.10, 1.50 | <0.01   | 1.21              | 1.02, 1.44 | 0.03    |

\* defined as BMI-sds. Both pattern scores were used as determinants simultaneously, in order to adjust for the adherence for the other pattern. Model 2 is adjusted for maternal age, pre-pregnancy BMI, parity, ethnicity, maternal smoking during pregnancy, educational level, birth weight and gestational age.



Supplementary Table S4. Mean differences in estimated BMI-sds for quartile of adherence (Q1 vs. Q4) to the dietary patterns at each age, derived from the random effects linear regression model (N=1233).

| Age (years) | Pattern 1: 'minimally processed foods' |         | Pattern 2: 'ultra-processed foods' |         |
|-------------|----------------------------------------|---------|------------------------------------|---------|
|             | Mean difference (95% CI)               | p-value | Mean difference (95% CI)           | p-value |
| 3           | -0.04 (-0.11, 0.03)                    | 0.25    | 0.04 (-0.04, 0.12)                 | 0.31    |
| 4           | -0.09 (-0.16, -0.01)                   | 0.02    | 0.00 (-0.09, 0.08)                 | 0.92    |
| 5           | -0.03 (-0.10, 0.03)                    | 0.33    | -0.06 (-0.14, 0.02)                | 0.15    |
| 10          | -0.08 (-0.16, -0.01)                   | 0.03    | -0.15 (-0.23, -0.06)               | 0.001   |

Both pattern scores were used as determinants simultaneously, in order to adjust for the adherence for the other pattern. Model 2 is adjusted for maternal age, pre-pregnancy BMI, parity, ethnicity, maternal smoking during pregnancy, educational level, birth weight and gestational age.



Supplementary Table S5. Associations between dietary patterns and BMI-sds development between 3 and 10 years of age (N=1233).

|                                              | B     | 95% CI      | p-value |
|----------------------------------------------|-------|-------------|---------|
| Pattern 1: 'minimally processed foods'       | 0.03  | -0.02, 0.09 | 0.26    |
| Pattern 2: 'ultra-processed foods'           | -0.03 | -0.09, 0.03 | 0.31    |
| Age (years)                                  |       |             |         |
| 4                                            | 0.06  | 0.02, 0.10  | <0.01   |
| 5                                            | 0.39  | 0.35, 0.44  | <0.001  |
| 10                                           | 0.30  | 0.24, 0.36  | <0.001  |
| Age x Pattern 1: 'minimally processed foods' |       |             |         |
| 4                                            | 0.04  | 0.00, 0.08  | 0.06    |
| 5                                            | -0.01 | -0.05, 0.03 | 0.78    |
| 10                                           | 0.04  | -0.02, 0.10 | 0.22    |
| Age x Pattern 2: 'ultra-processed foods'     |       |             |         |
| 4                                            | 0.04  | 0.00, 0.07  | 0.07    |
| 5                                            | 0.08  | 0.03, 0.12  | <0.001  |
| 10                                           | 0.15  | 0.08, 0.21  | <0.001  |

Both pattern scores were used as determinants simultaneously, in order to adjust for the adherence for the other pattern. Model is adjusted for maternal age, pre-pregnancy BMI, parity, ethnicity, maternal smoking during pregnancy, educational level, birth weight and gestational age.
